# Supplementary material for: Novel nonsteroidal inhibitors of the human 11-beta hydroxysteroid dehydrogenase type 1 enzyme for the treatment of obesity and metabolic syndrome
Source: Research Square preprint supplement (doi:10.21203/rs.3.rs-7933515/v1), 2025-11-06
Supplement: Supplementary file 1 [file 3a93e26062e5bdade3580d69.docx]

**SUPLEMENTARY INFORMATION**

**Novel nonsteroidal inhibitors of the human 11-beta hydroxysteroid dehydrogenase type 1 enzyme for the treatment of obesity and metabolic syndrome**

Pablo González*a, Cristian A. Carvajal*b,c, Alejandra Tapia-Castilloc,d, Gonzalo Recabarrene, Benjamín Diethelm f,g, Eduardo Riquelmeh, Mauricio A. Garcíae, Andrea Vecchiolab,c, Fidel A. Allendei, Jorge A. Pérezb,c, Sandra Solarii, René Baudrandb,c, and Carlos E. Fardellab,c

**SUPLEMENTARY METHODS**

**A. Ionization and fragmentation of compounds *J* and *L*.**

For the MRM parameters and fragment quantifier table, the compound *J* compound exhibited a DP (declustering potential) of 11, CE (collision energy) of 27, and CXP (collision cell exit potential) of 10, while compound *L* displayed higher values with a DP of 41, CE of 33, and CXP of 10. Minoxidil showed a DP of 36, CE of 21, and CXP of 14, whereas Atenolol presented the highest values across all parameters with a DP of 86, CE of 35, and CXP of 12.

For the elution gradients table, the elution profiles for compounds *J* and *L* were delineated. compound *J* eluted gradually from 5% to 100% B (mobile phase) over 5 minutes, maintaining 100% B until the 7th minute, before reverting to 5% B at the 8th minute. On the other hand, compound *L* followed a similar pattern, but with a slower increase in B concentration, reaching 60% B at the 3.5th minute and returning to 5% B at the 4th minute.

**B. Viability assays for preadipocytes and adipocytes SW872 cells**

The MTS assay (CellTiter 96® AQueous Non-Radioactive Cell Proliferation Assay, Promega, #G1112), a colorimetric method for assessing cellular viability, involves converting MTS to formazan in the presence of PMS. After plating 10,000-20,000 cells per well, a mixture of 2 mL MTS solution, 100 µL PMS solution, and 8.4 mL culture medium is added for 100 reactions. Following treatment, 100 µL of the MTS mix is added to each well, and absorbance at 490 nm is measured after 90 minutes at 37°C. For SW872 preadipocytes, cultured with DMEM-F12 1% FBS Steroids and EVs free medium, cells were treated with our novel drugs or vehicle, then incubated with MTS mix. SW872 adipocytes, induced with a differentiation cocktail for 10 days, were treated with our novel drugs in fresh media, with carbenoxolone as a positive control. Absorbance at 490 nm was measured post-incubation with MTS solution. A death control using 10% SDS was included in both assays.

**C. Differentiation and cell viability of 11β-HSD1 and 11β-HSD2 preadipocytes and differentiated Adipocytes in SW872 human cells and primary culture (human VAT)**

We observed a differentiation of SW872 preadipocytes into adipocytes, confirmed by Oil Red O staining and the presence of lipid droplets (Figure 2). Additionally, we did not observe an impact on cell viability when treated with different concentrations (0.1, 1, 10, 100, 1000, and 10000 nM) of the compounds (compounds *J, L* and *M*).

**SUPLEMENTARY RESULTS**

**Figure S1. Inhibition of 11β-HSD1 by novel compounds in differentiated adipocyte from SW872 cells.** A) Absolute cortisol concentration was measured by HPLC after 24 hours from treatment with the compounds at 500nM (*E, J, L, M*, and *N*) and 500nM carbenoxolone in differentiated adipocytes SW872. On right side, percentage of inhibition of 11β-HSD1 reductase activity caused by the compounds *E, J, L, M*, and *N* at a concentration of 500nM for a period of 24 hours in differentiated adipocytes.
